# Supplementary material
Source: PubMed Central journal article supplement (PMC3324762)
Supplement: pro0021-0178-SD1.pdf [file pro0021-0178-SD1.pdf]

## Supplementary Figures and Tables

### Figure Legends

#### **Figure A. H-D exchange time course studies of intact proenkephalin (PE) and individual peptides derived from PE.**

H-D exchange data for DXMS studies of intact PE protein (solid lines) and of peptides (dotted lines) derived from PE (by pepsin) are plotted for subdomains indicated by the amino acid numbers provided at the top of each graph. The graphs compare the number of deuterons incorporated into each peptide, y-axis (shown for +1 charge state of peptides, and for +2 charge state if it was the only charge state observed) at different times of incubation in D<sub>2</sub>O buffer for acquisition of H-D exchange data. The standard deviation of deuterium incorporation measured in replicate determinations was typically less than 5% of the mean, as reported (49, 50) These plots show similarities and differences in deuteration exchange levels for peptide amide hydrogens at specific regions in intact PE, which maybe influenced by tertiary interactions, and PE-derived peptides, which only have intrinsic interactions of the primary peptide structure.

#### **Figure B. H-D exchange of intact PE and peptides derived from PE at cleavage site domains.**

Comparison of relative H-D exchange rates at the twelve dibasic residue cleavage sites of intact PE, and peptides derived from, are illustrated at 1 second time point. More limited deuteration of intact PE is observed for the 12 cleavage site domains, compared to peptides derived from PE.

## **Table Legends**

### **Table A. Charge states of peptides in the comparison of intact PE and peptides derived from PE in DXMS experiments.**

Peptides in DXMS analyses of figures 3 and 4 are listed, indicating the charge states observed in LC-MS analyses. The relative deuteration of these peptides of intact PE and for PE-derived peptides are plotted in supplemental Figure A, in time-course experiments. The relative deuteration of peptides at +1 or +2 charge states were identical. Therefore, plots of relative deuteration utilized peptides at +1 charge state, except in the case where only the +2 charge state was observed and utilized for time course plots of Figure A.

### **Table B. Peptides that span cleavage sites of PE.**

Peptides spanning the twelve cleavage sites of PE are listed. For each of the cleavages sites #1-12, the location of the dibasic cleavage sites are shown by the residues numbers. Peptides spanning each of these cleavate sites are listed, including their observed charged states. The relative deuteration of these peptides (averages) were plotted in Figure 5 for comparison of their relative accessibilities to the aqueous environment.

**Supplemental Figure A.**  
**H-D Exchange Time-Course of Intact PE and**  
**Peptides Derived from PE**

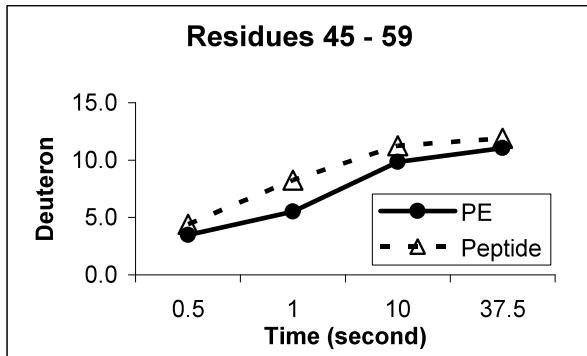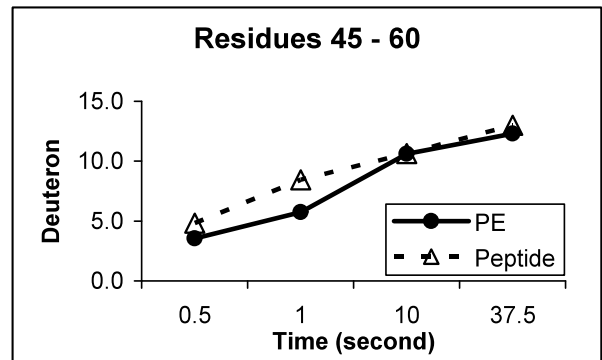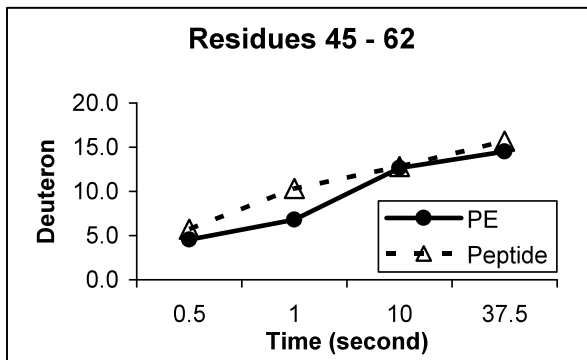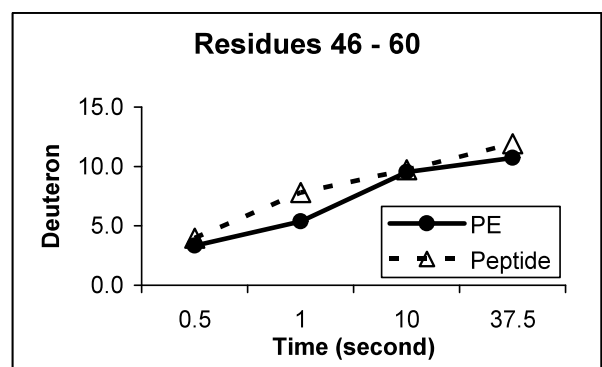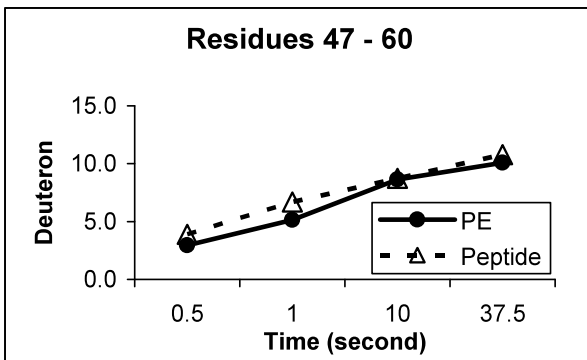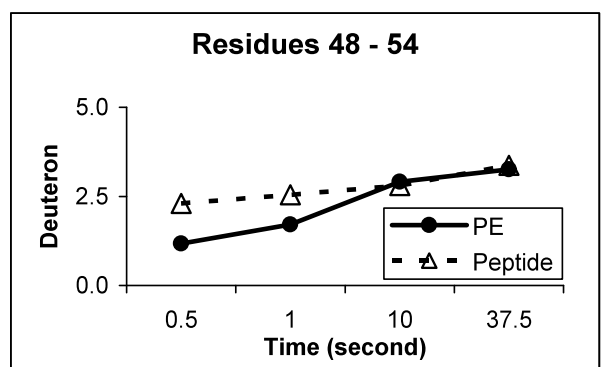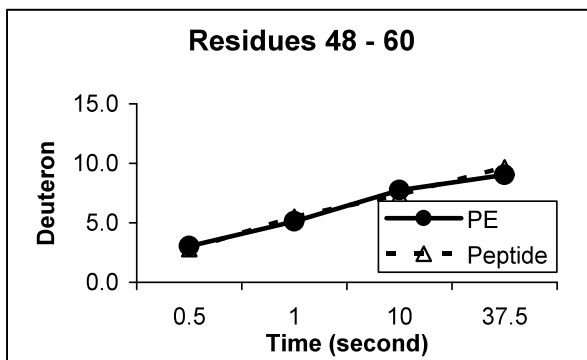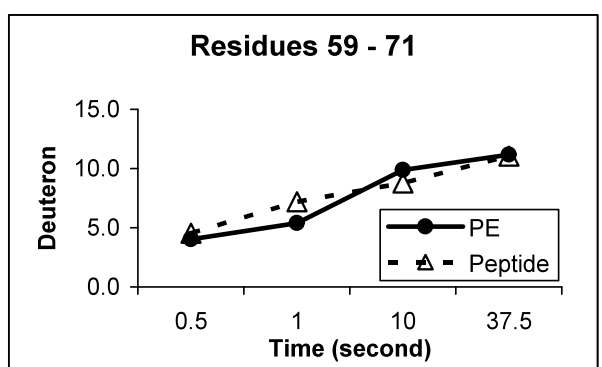

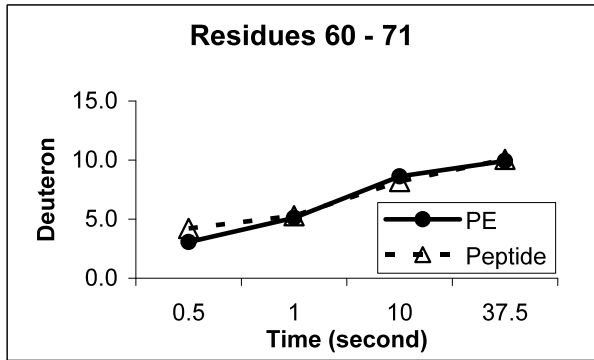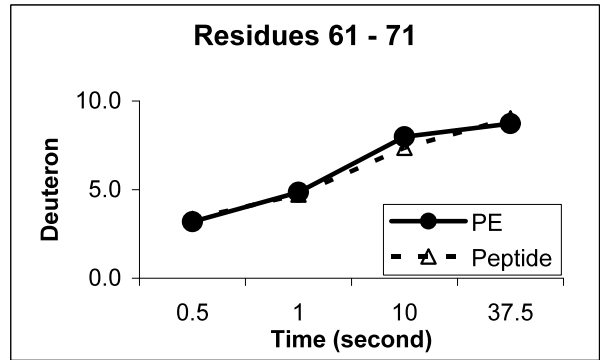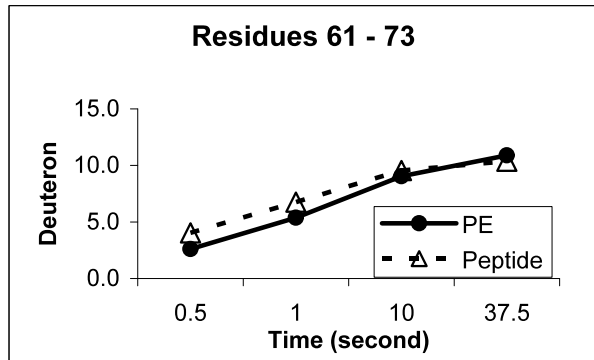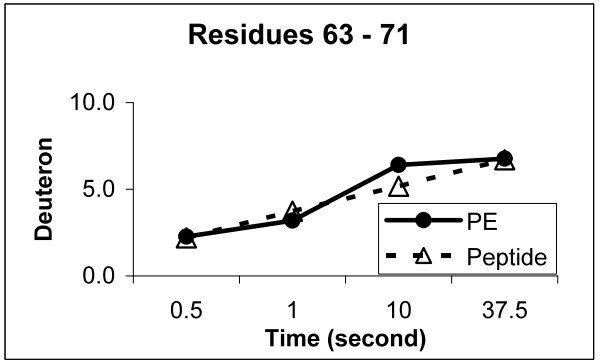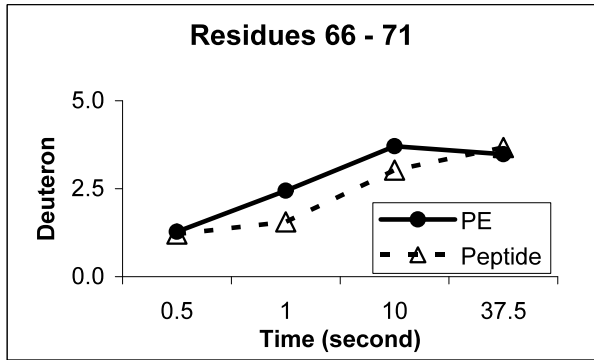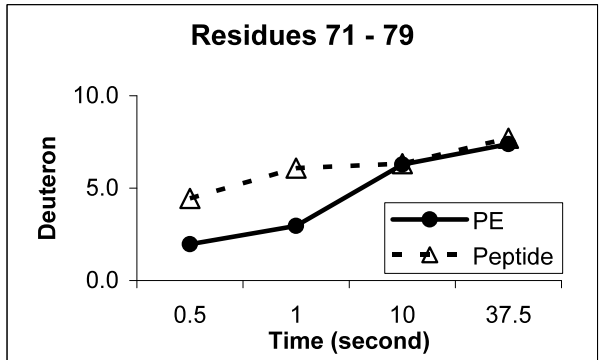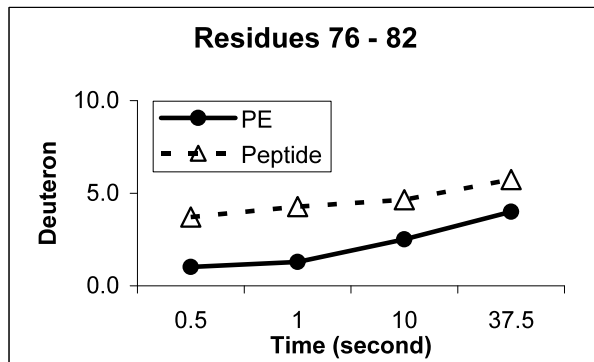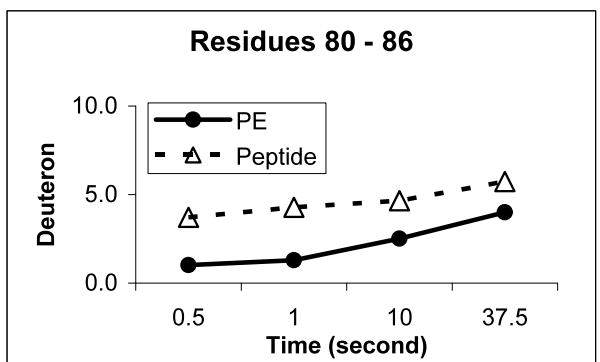

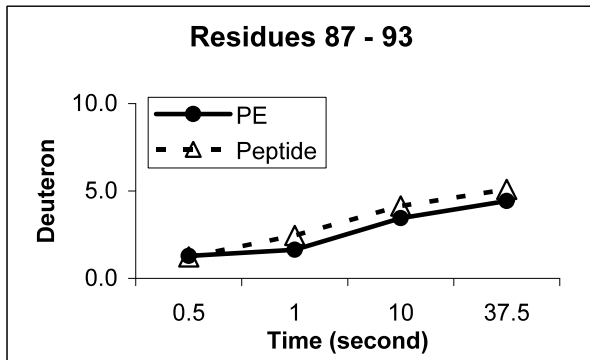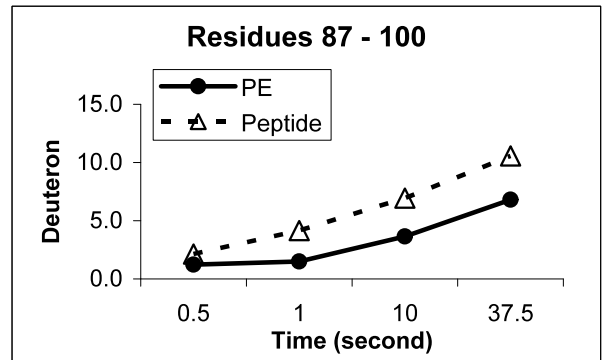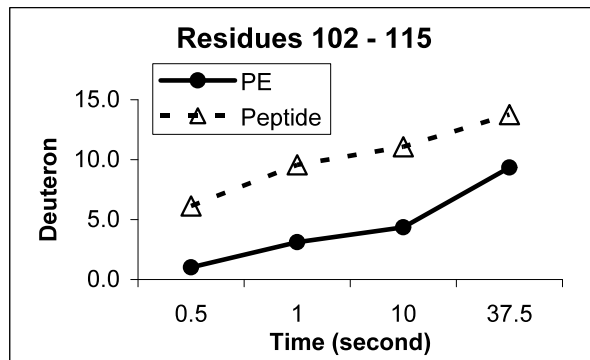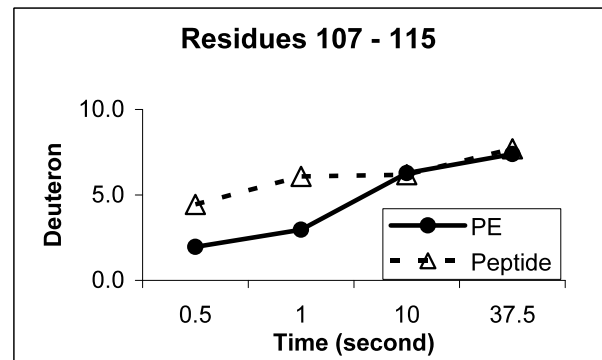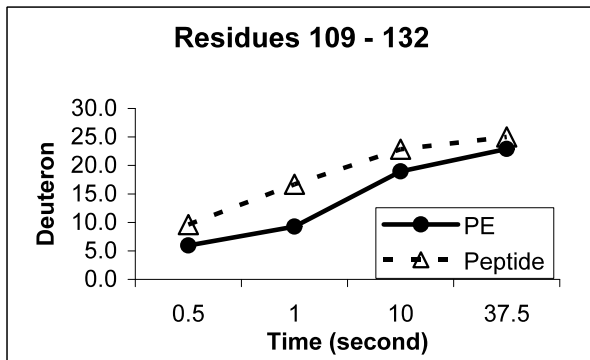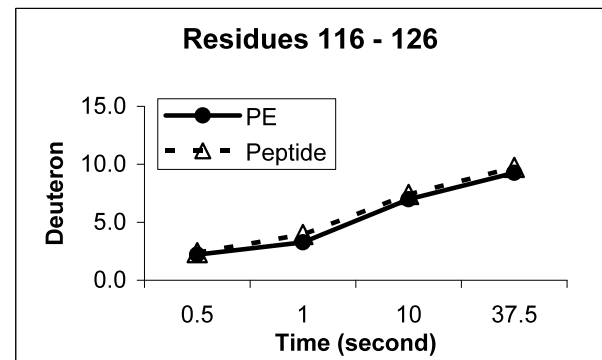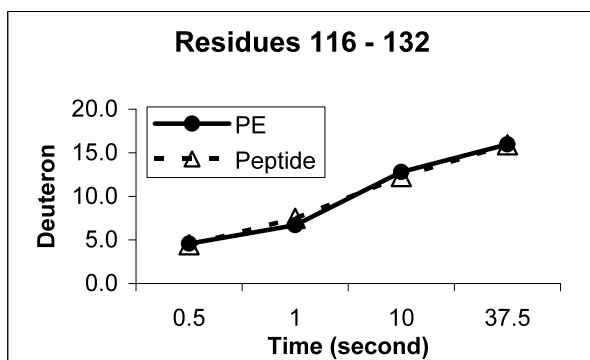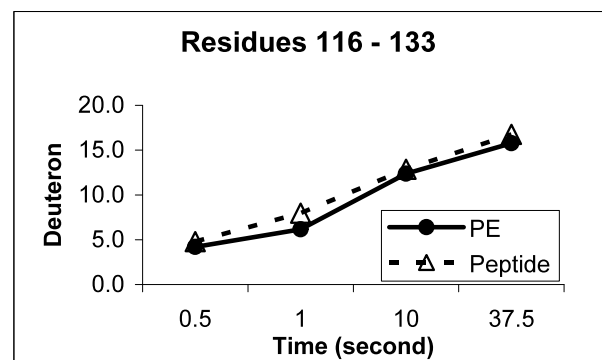

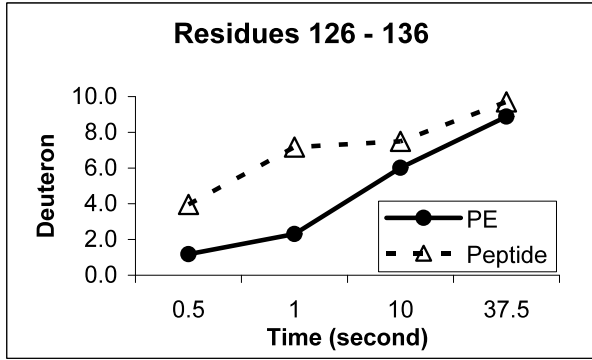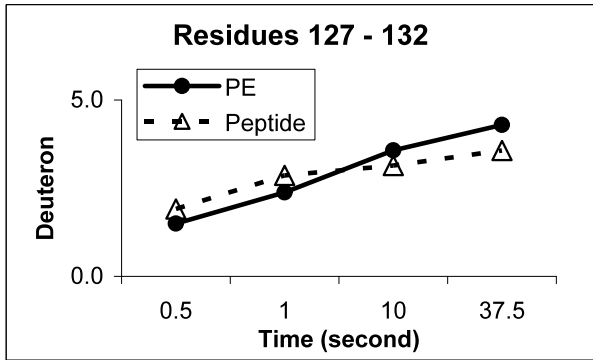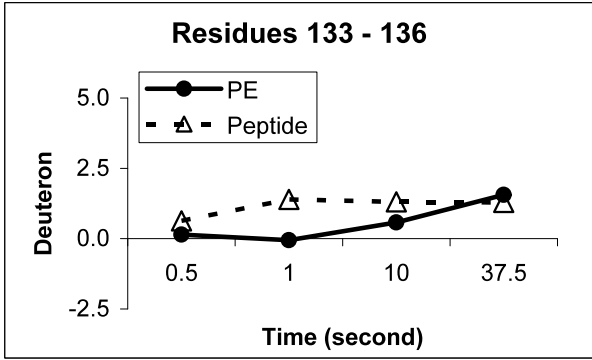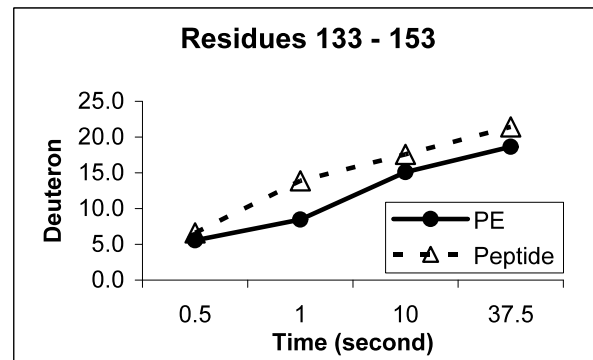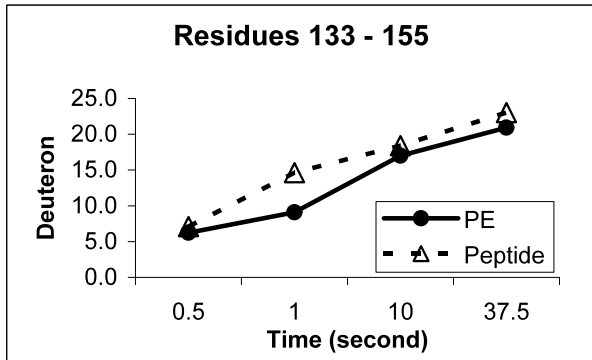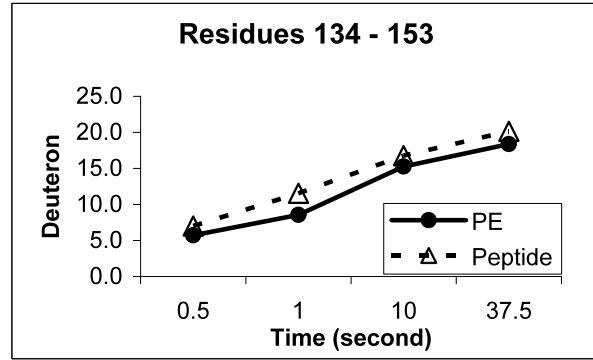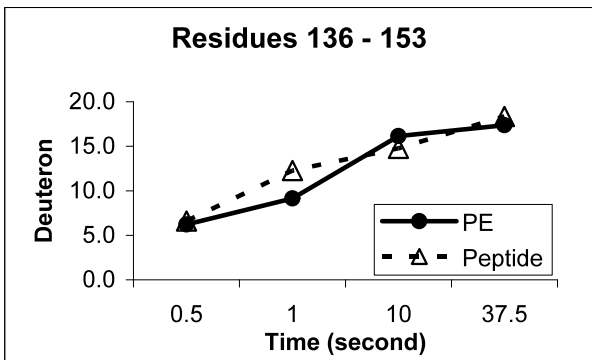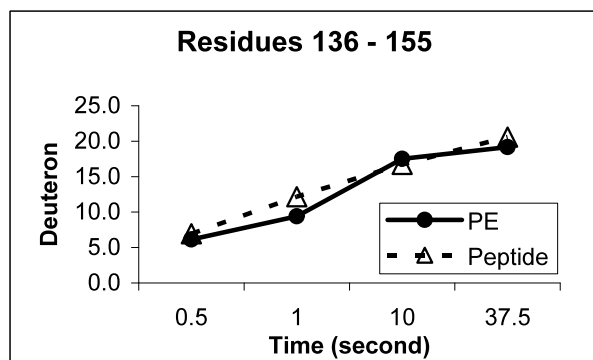

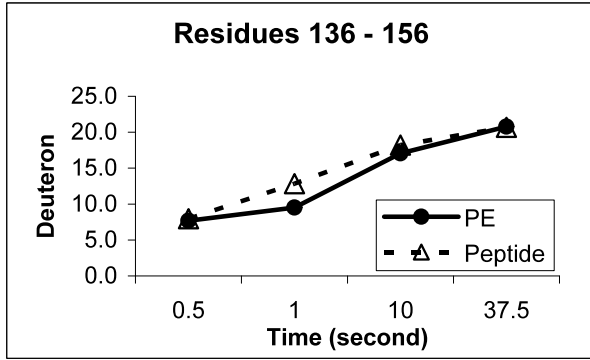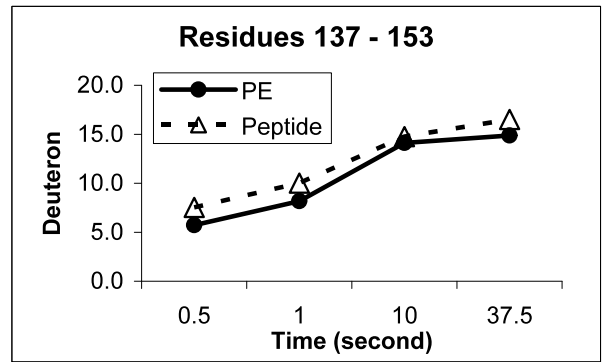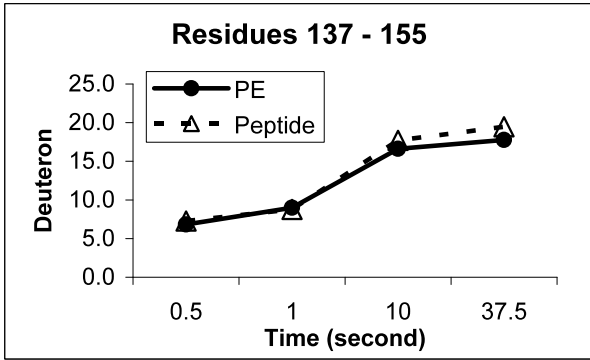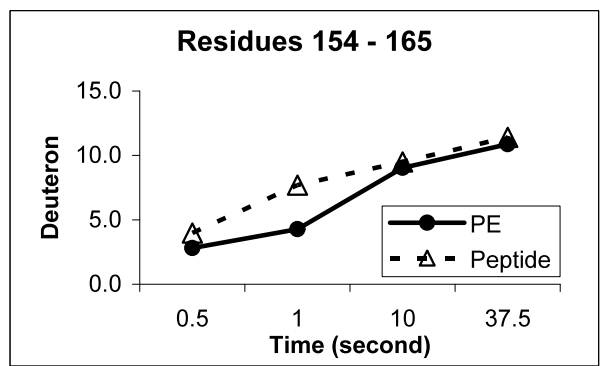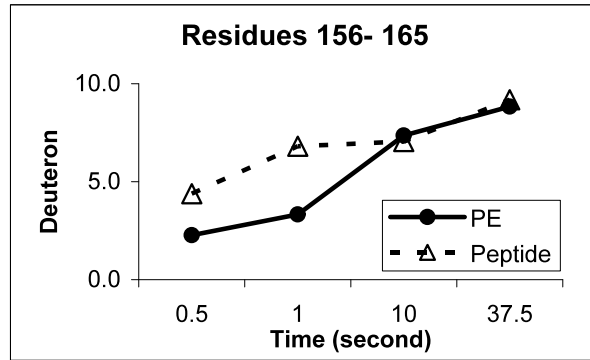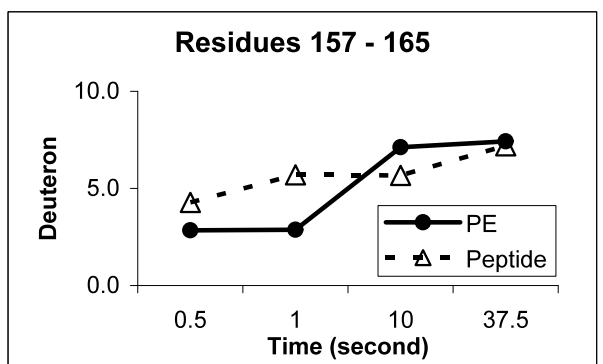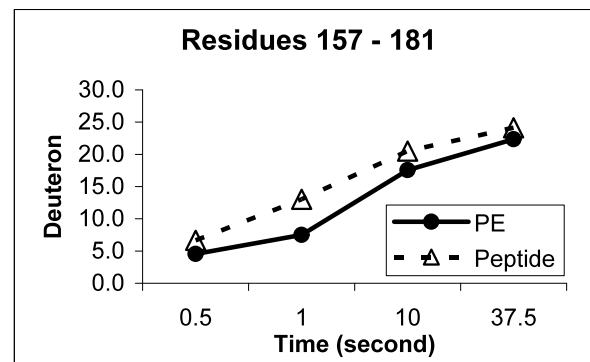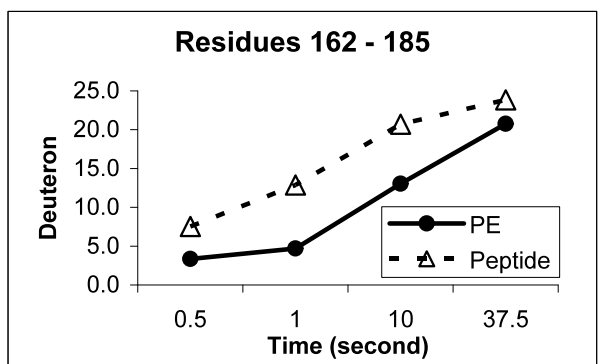

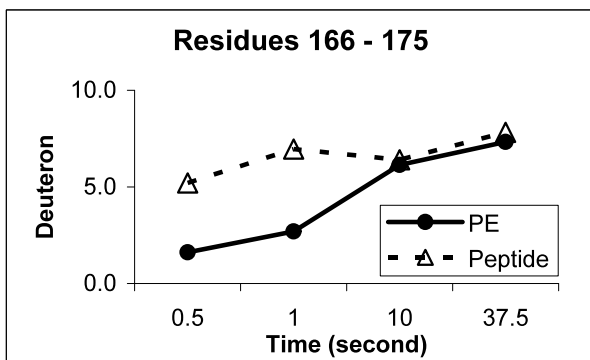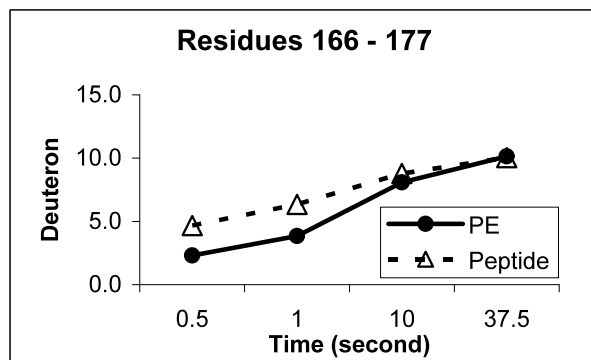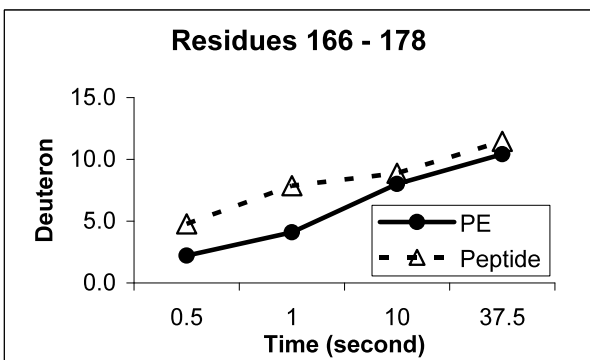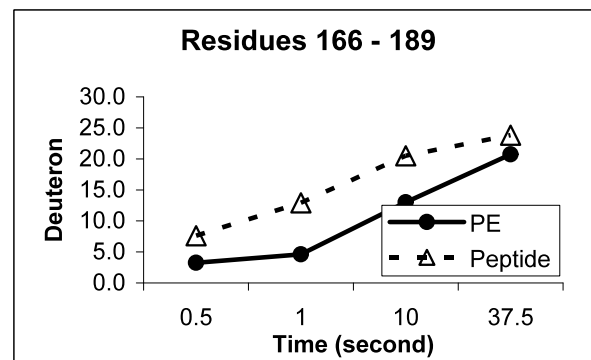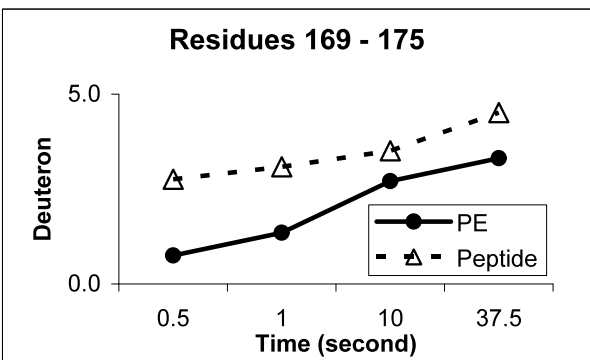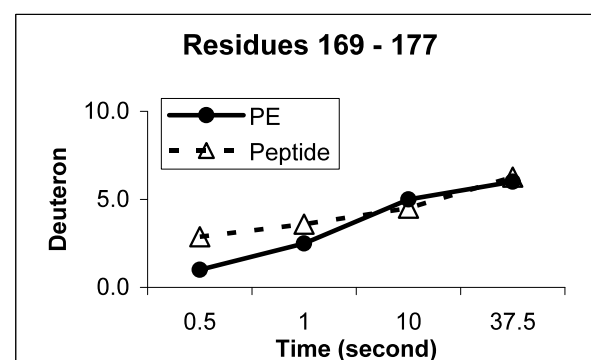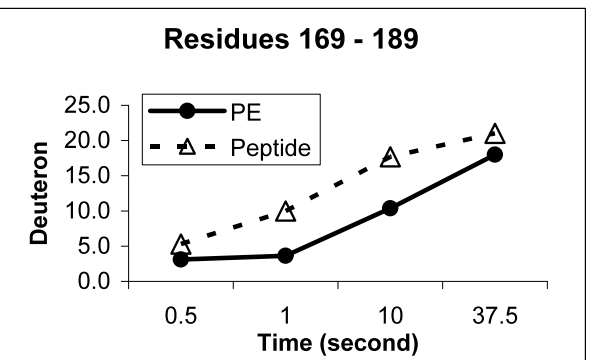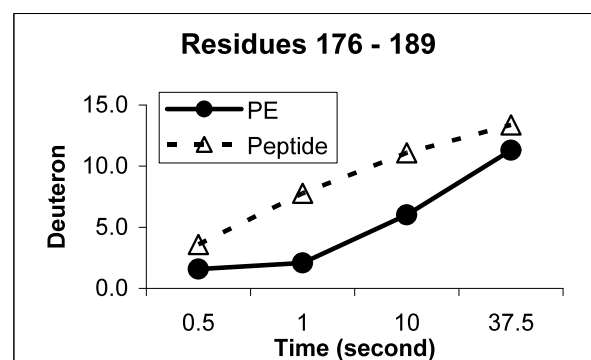



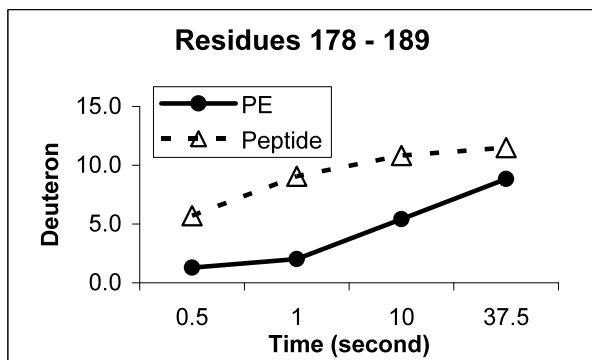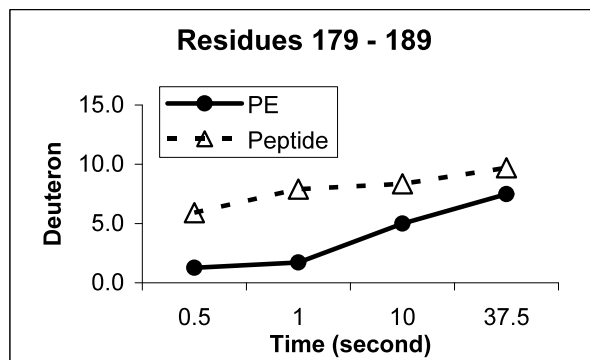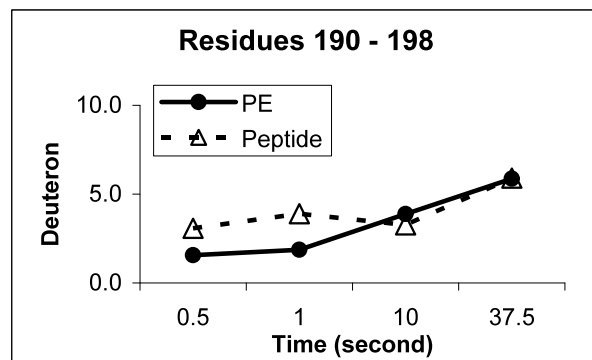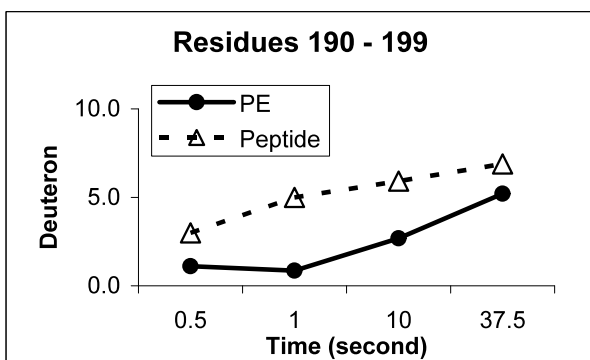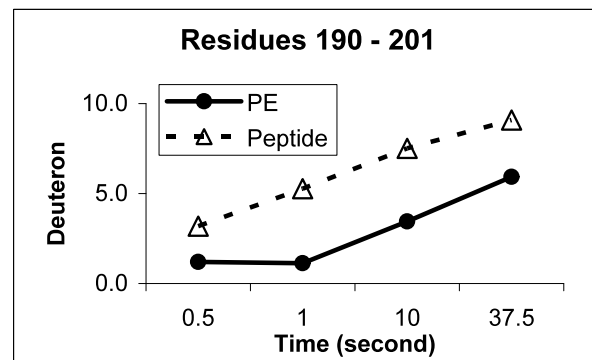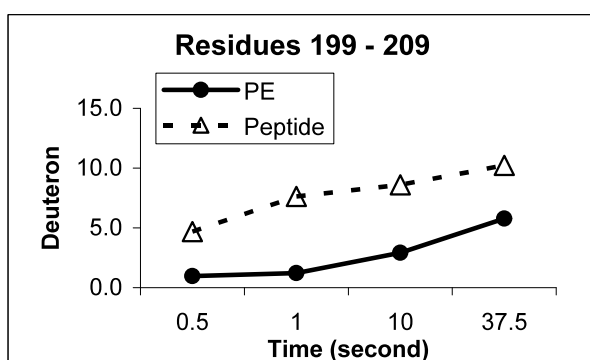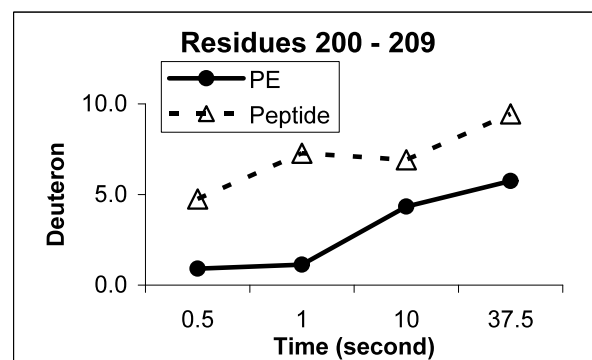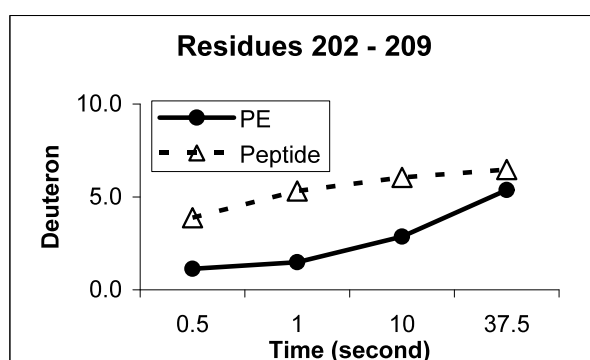

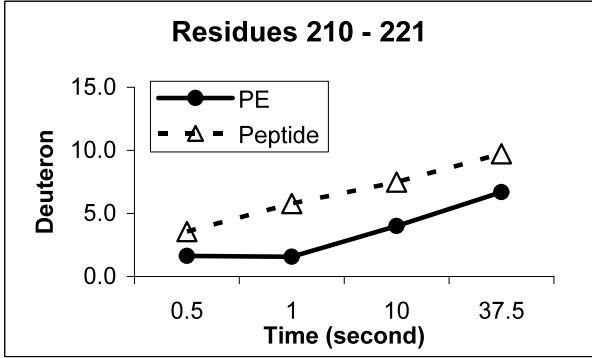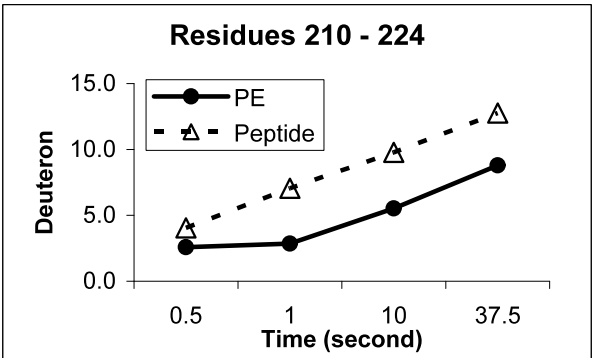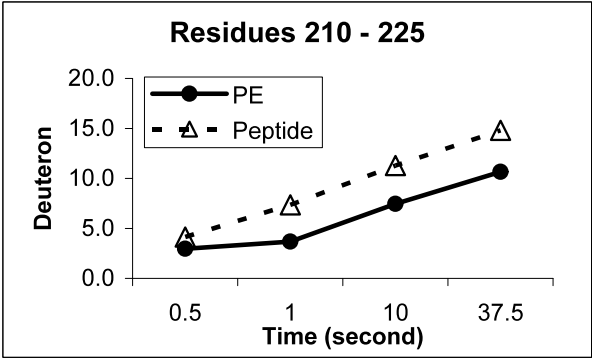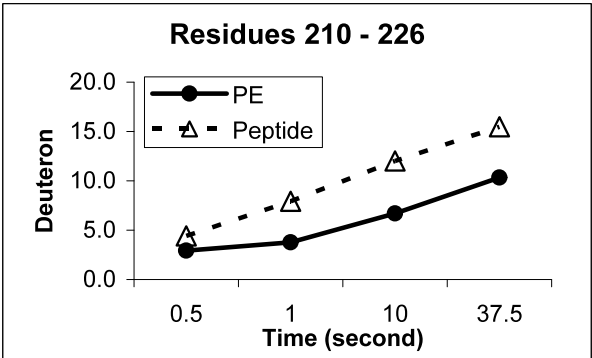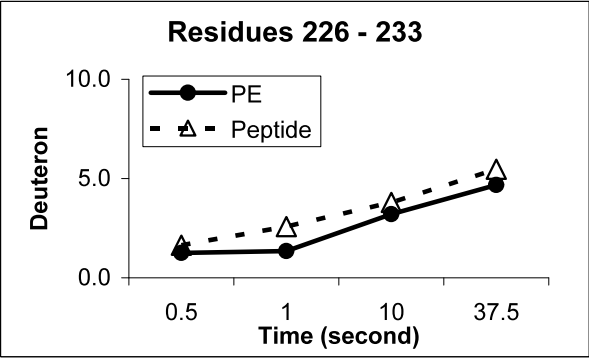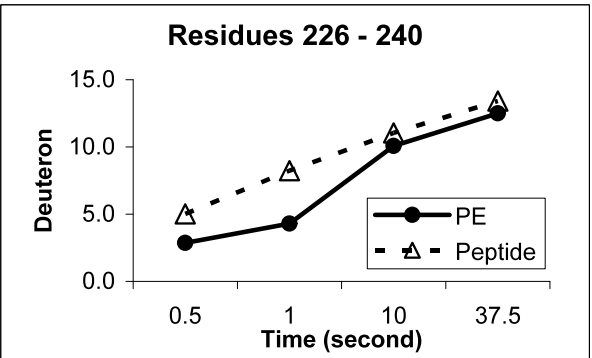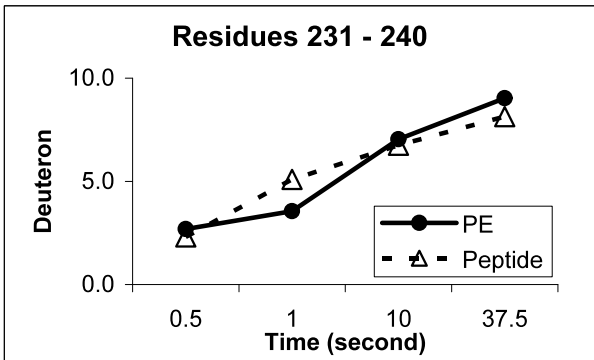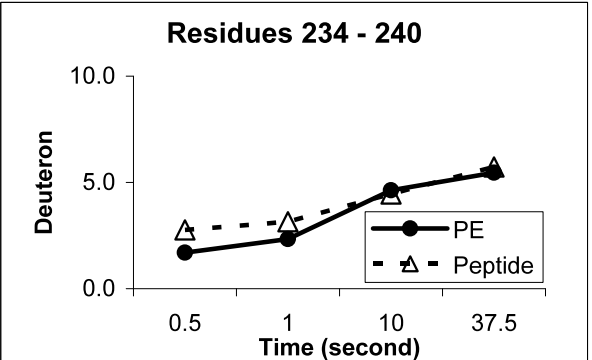

**Figure B**  
**H-D Exchange of Intact PE and Peptides Derived from PE**  
**at Cleavage Site Domains**

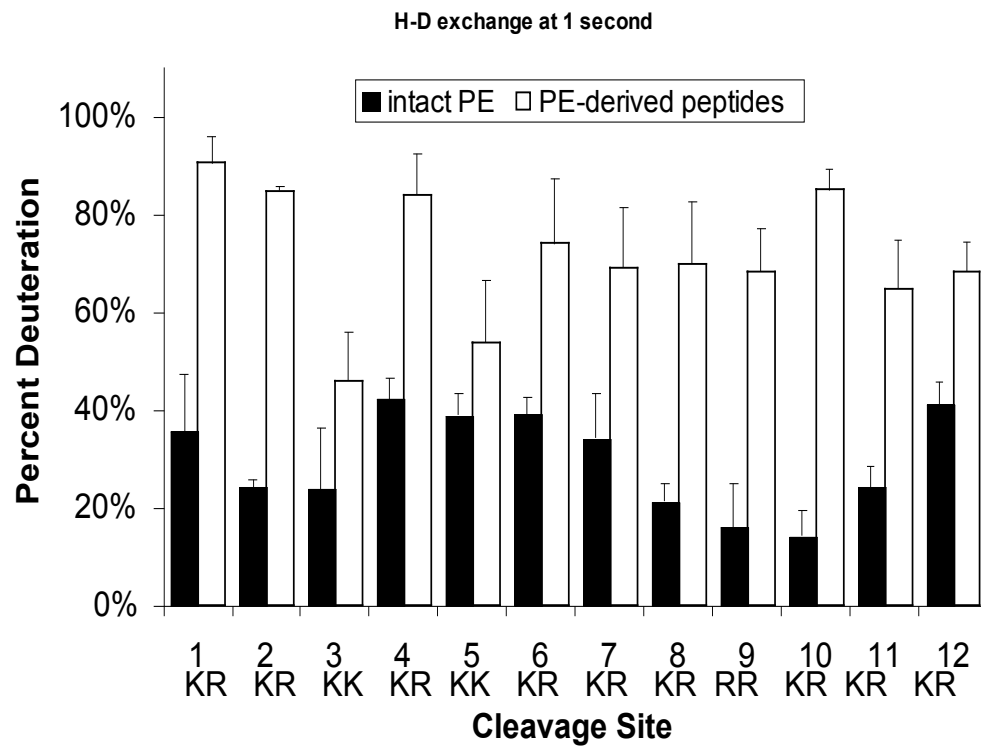

**Supplemental Table A**  
**Charge States of Peptides in the Comparison of intact PE**  
**and Peptides Derived from PE in DXMS Experiments**

| Peptide |     |        |
|---------|-----|--------|
| Start   | End | Charge |
| 45      | 59  | +1     |
| 45      | 59  | +2     |
| 45      | 60  | +2     |
| 45      | 62  | +2     |
| 46      | 60  | +1     |
| 46      | 60  | +2     |
| 47      | 60  | +1     |
| 47      | 60  | +2     |
| 48      | 54  | +1     |
| 48      | 54  | +2     |
| 48      | 60  | +1     |
| 48      | 60  | +2     |
| 59      | 71  | +2     |
| 60      | 71  | +1     |
| 60      | 71  | +2     |
| 61      | 71  | +1     |
| 61      | 71  | +2     |
| 61      | 73  | +2     |
| 63      | 71  | +1     |
| 63      | 71  | +2     |
| 66      | 71  | +1     |
| 71      | 79  | +1     |
| 71      | 79  | +2     |
| 76      | 82  | +1     |
| 76      | 82  | +2     |
| 80      | 86  | +1     |
| 80      | 86  | +2     |
| 87      | 93  | +1     |
| 87      | 100 | +2     |
| 102     | 115 | +2     |
| 107     | 115 | +1     |
| 107     | 115 | +2     |

| Peptide |     |        |
|---------|-----|--------|
| Start   | End | Charge |
| 109     | 132 | +2     |
| 116     | 126 | +2     |
| 116     | 132 | +2     |
| 116     | 133 | +2     |
| 126     | 136 | +1     |
| 126     | 136 | +2     |
| 127     | 132 | +1     |
| 133     | 136 | +1     |
| 133     | 153 | +2     |
| 133     | 155 | +2     |
| 134     | 153 | +2     |
| 136     | 153 | +2     |
| 136     | 155 | +2     |
| 136     | 156 | +2     |
| 137     | 153 | +2     |
| 137     | 155 | +2     |
| 154     | 165 | +1     |
| 154     | 165 | +2     |
| 156     | 165 | +1     |
| 156     | 165 | +2     |
| 157     | 165 | +2     |
| 157     | 181 | +2     |
| 162     | 185 | +2     |
| 162     | 185 | +3     |
| 166     | 175 | +1     |
| 166     | 175 | +2     |
| 166     | 177 | +2     |
| 166     | 178 | +2     |
| 166     | 189 | +2     |
| 166     | 189 | +3     |
| 169     | 175 | +1     |
| 169     | 175 | +2     |

| Peptide |     |        |
|---------|-----|--------|
| Start   | End | Charge |
| 169     | 177 | +2     |
| 169     | 189 | +2     |
| 176     | 189 | +1     |
| 176     | 189 | +2     |
| 178     | 189 | +2     |
| 179     | 189 | +1     |
| 179     | 189 | +2     |
| 190     | 198 | +1     |
| 190     | 198 | +2     |
| 190     | 199 | +2     |
| 190     | 201 | +2     |
| 199     | 209 | +1     |
| 199     | 209 | +2     |
| 200     | 209 | +1     |
| 200     | 209 | +2     |
| 202     | 209 | +1     |
| 202     | 209 | +2     |
| 210     | 221 | +1     |
| 210     | 221 | +2     |
| 210     | 224 | +2     |
| 210     | 225 | +1     |
| 210     | 225 | +2     |
| 210     | 226 | +2     |
| 226     | 233 | +2     |
| 226     | 240 | +1     |
| 226     | 240 | +2     |
| 231     | 240 | +1     |
| 234     | 240 | +1     |
| 234     | 240 | +2     |

**Supplemental Table B.  
Peptides Spanning PE Cleavage Sites**

| Cleavage site | Intact Protein | PE-derived Peptide | Cleavage site | Intact Protein | PE-derived Peptide | Cleavage site | Intact Protein | PE-derived Peptide |              |              |
|---------------|----------------|--------------------|---------------|----------------|--------------------|---------------|----------------|--------------------|--------------|--------------|
| #1 74-75      | 61-79 (+2)     | 71-79 (+1)         | #7 170-171    | 156-175 (+2)   | 157-181 (+2)       | #9 191-192    | 190-198 (+1)   | 190-198 (+1)       |              |              |
|               | 71-79 (+1)     | 71-79 (+2)         |               | 156-175 (+3)   | 162-185 (+2)       |               | 190-198 (+2)   | 190-198 (+2)       |              |              |
|               | 71-79 (+2)     |                    |               | 157-165 (+2)   | 162-185 (+3)       |               | 190-199 (+2)   | 190-199 (+2)       |              |              |
|               | 72-86 (+2)     |                    |               | 157-181 (+2)   | 166-175 (+1)       |               | 190-201 (+2)   | 190-201 (+2)       |              |              |
| #2 81-82      | 72-86 (+2)     | 76-82 (+1)         |               | 157-181 (+3)   | 166-175 (+2)       | 190-209 (+2)  | 190-209 (+2)   | #10 204-205        | 190-209 (+2) | 199-209 (+1) |
|               | 76-82 (+1)     | 76-82 (+2)         |               | 162-185 (+2)   | 166-177 (+2)       | 190-209 (+3)  | 199-209 (+3)   |                    | 199-209 (+2) | 199-209 (+2) |
|               | 76-82 (+2)     | 80-86 (+1)         |               | 162-185 (+3)   | 166-178 (+2)       | 199-209 (+1)  | 199-209 (+1)   |                    | 199-210 (+2) | 199-210 (+2) |
|               | 80-86 (+1)     | 80-86 (+2)         |               | 166-175 (+2)   | 166-189 (+2)       | 199-209 (+2)  | 199-209 (+2)   |                    | 200-209 (+1) | 200-209 (+1) |
|               | 80-86 (+2)     |                    |               | 166-177 (+2)   | 166-189 (+3)       | 200-209 (+1)  | 200-209 (+1)   |                    | 200-209 (+2) | 200-209 (+2) |
| #3 88-89      | 87-93 (+1)     | 87-93              |               | 166-178 (+2)   | 169-175 (+1)       | 200-209 (+2)  | 200-209 (+2)   | 202-209 (+1)       | 202-209 (+1) |              |
|               | 87-100 (+2)    | 87-97 (+1)         |               | 166-189 (+2)   | 169-175 (+2)       | 202-209 (+1)  | 202-209 (+1)   | 202-209 (+2)       | 202-209 (+2) |              |
|               |                | 87-97 (+2)         |               | 166-189 (+3)   | 169-177 (+2)       | 202-209 (+2)  | 202-209 (+2)   | 202-209 (+2)       | 202-209 (+2) |              |
|               |                | 87-100 (+1)        |               | 169-175 (+1)   | 169-189 (+2)       | 202-209 (+1)  | 202-209 (+1)   | 202-209 (+2)       | 202-209 (+2) |              |
|               |                | 87-100 (+2)        |               | 169-175 (+2)   | 169-189 (+3)       |               |                |                    |              |              |
| #4 110-111    | 97-120 (+2)    | 102-115 (+2)       | 169-177 (+2)  | 169-189 (+3)   | #11 211-212        | 210-221 (+1)  | 210-217 (+1)   |                    |              |              |
|               | 102-115 (+2)   | 107-115 (+1)       | 169-189 (+2)  | 210-221 (+2)   |                    | 210-217 (+2)  | 210-217 (+2)   |                    |              |              |
|               | 107-115 (+1)   | 107-115 (+2)       | #8 184-185    | 162-185 (+2)   |                    | 162-185 (+2)  | 210-224 (+2)   | 210-221 (+1)       |              |              |
|               | 107-115 (+2)   | 109-132 (+2)       |               | 162-185 (+3)   |                    | 162-185 (+3)  | 210-225 (+1)   | 210-221 (+2)       |              |              |
|               | 109-132 (+2)   |                    |               | 166-189 (+2)   |                    | 166-189 (+2)  | 210-225 (+2)   | 210-224 (+2)       |              |              |
|               |                | 166-189 (+3)       |               | 166-189 (+3)   | 210-226 (+2)       | 210-225 (+1)  |                |                    |              |              |
|               |                | 169-189 (+2)       |               | 169-189 (+2)   |                    | 210-225 (+2)  |                |                    |              |              |
| #5 117-118    | 109-132 (+2)   | 109-132 (+2)       | 176-189 (+1)  | 169-189 (+3)   | #12 235-236        | 218-242 (+2)  | 226-240 (+1)   |                    |              |              |
|               | 116-126 (+2)   | 116-126 (+2)       | 176-189 (+2)  | 176-189 (+1)   |                    | 226-240 (+1)  | 226-240 (+2)   |                    |              |              |
|               | 116-132 (+2)   | 116-132 (+1)       | 178-189 (+2)  | 176-189 (+2)   |                    | 226-240 (+2)  | 226-240 (+3)   |                    |              |              |
|               | 116-133 (+2)   | 116-132 (+2)       | 179-189 (+1)  | 176-189 (+3)   |                    | 231-240 (+1)  | 231-240 (+1)   |                    |              |              |
|               | 116-153 (+3)   | 116-133 (+2)       | 179-189 (+2)  | 178-189 (+2)   |                    | 234-240 (+1)  | 234-240 (+1)   |                    |              |              |
| #6 160-161    | 133-165 (+3)   | 154-165 (+1)       | 182-189 (+1)  | 179-189 (+1)   | 234-240 (+2)       | 234-240 (+2)  |                |                    |              |              |
|               | 154-165 (+1)   | 154-165 (+2)       |               |                |                    |               |                |                    |              |              |
|               | 154-165 (+2)   | 156-165 (+1)       |               |                |                    |               |                |                    |              |              |
|               | 156-165 (+1)   | 156-165 (+2)       |               |                |                    |               |                |                    |              |              |
|               | 156-165 (+2)   | 157-165 (+1)       |               |                |                    |               |                |                    |              |              |
|               | 156-175 (+2)   | 157-165 (+2)       |               |                |                    |               |                |                    |              |              |
|               | 156-175 (+3)   | 157-181 (+2)       |               |                |                    |               |                |                    |              |              |
|               | 157-165 (+2)   | 158-165 (+1)       |               |                |                    |               |                |                    |              |              |
|               | 157-181 (+2)   | 158-165 (+2)       |               |                |                    |               |                |                    |              |              |
|               | 157-181 (+3)   |                    |               |                |                    |               |                |                    |              |              |
